# Supplementary material
Source: PubMed Central journal article supplement (PMC2717880)
Supplement: en.2008-1708_1.pdf [file en.2008-1708_1.pdf]

Supplemental Table 1. Plasma Testosterone levels observed in Experiments 1 and 2.

|                             | GROUPS                                                      |                                                                 |                                                            |                                                              |                                        |
|-----------------------------|-------------------------------------------------------------|-----------------------------------------------------------------|------------------------------------------------------------|--------------------------------------------------------------|----------------------------------------|
|                             | Prepub treatment/<br>adult testing<br>T (ng/ml)<br>mean±SEM | Adolescent treatment/<br>adult testing<br>T (ng/ml)<br>mean±SEM | Adult treatment/<br>adult testing<br>T (ng/ml)<br>mean±SEM | Prepub treatment/<br>prepub testing<br>T (ng/ml)<br>mean±SEM | Adult control<br>T (ng/ml)<br>mean±SEM |
| <b>EXPERIMENTS</b>          |                                                             |                                                                 |                                                            |                                                              |                                        |
| Exp1: 19 day                |                                                             |                                                                 |                                                            |                                                              |                                        |
| organizational implant      |                                                             |                                                                 |                                                            |                                                              |                                        |
| 19d T implant               | 4.63 ± 0.50                                                 | 3.12 ± 0.28                                                     | 7.66 ± 3.430                                               |                                                              |                                        |
| 19d Blank implant           | Below--                                                     | 0.118 ± 0.01                                                    | 0.21 ± 0.10                                                |                                                              |                                        |
| Exp1: 7-day adult T-implant |                                                             |                                                                 |                                                            |                                                              |                                        |
| 19d T/adult T-implant       | 5.47 ± 0.72 <sup>a</sup>                                    | 4.26 ± 0.23 <sup>b</sup>                                        | 3.68 ± 0.48 <sup>b</sup>                                   |                                                              |                                        |
| 19d 0/adult T-implant       | 5.16 ± 0.39                                                 | 3.72 ± 0.12                                                     | 3.76 ± 0.48                                                |                                                              |                                        |
| Exp 2:                      |                                                             |                                                                 |                                                            |                                                              |                                        |
| Juvenile vs. Adult          |                                                             |                                                                 |                                                            |                                                              |                                        |
| Blank-capsule               |                                                             |                                                                 |                                                            | 0.153± 0.03                                                  |                                        |
| T-capsule                   |                                                             |                                                                 |                                                            | 4.42 ± 0.67                                                  | 4.45 ± 0.37                            |

\* indicates significant difference in mean T levels between blank and T-treated males within the same group and treatment period. A shared letter indicates no difference in overall mean T levels between groups. Experiment 1 had both a 19d organizational treatment period (T or blank capsules), and a 7d T-treatment prior to adult behavior testing. Immediately following the 19d organizational treatment period, T capsules yielded significantly higher plasma T levels than blank capsules, but no significant differences in plasma T levels were found between pre-, mid, and post-adolescent organizational treatments, suggesting that all groups received similar organizational T treatments. Following the 7d treatment period in adulthood, males receiving pre-adolescent organizational treatments (blank and T) had slightly, but significantly higher plasma T levels. The narrow range of plasma T values observed here are all within normal physiological range, and are not likely to cause behavioral differences between groups. For Exp. 2, T capsules yielded significantly higher plasma T levels than blank capsules, but no significant differences in plasma T levels were found between T-treated juvenile males and adult control males, suggesting plasma T levels were equivalent at the time of behavior testing and brain collection.
